# Supplementary material for: Activation of MAT2A-RIP1 signaling axis reprograms monocytes in gastric cancer
Source: PubMed Central journal article supplement — J Immunother Cancer. 2021 Feb 16;9(2):e001364. doi: 10.1136/jitc-2020-001364 (PMC7888314; doi:10.1136/jitc-2020-001364), 2021-02-16
Supplement: jitc-2020-001364supp001.pdf [file jitc-2020-001364supp001.pdf]

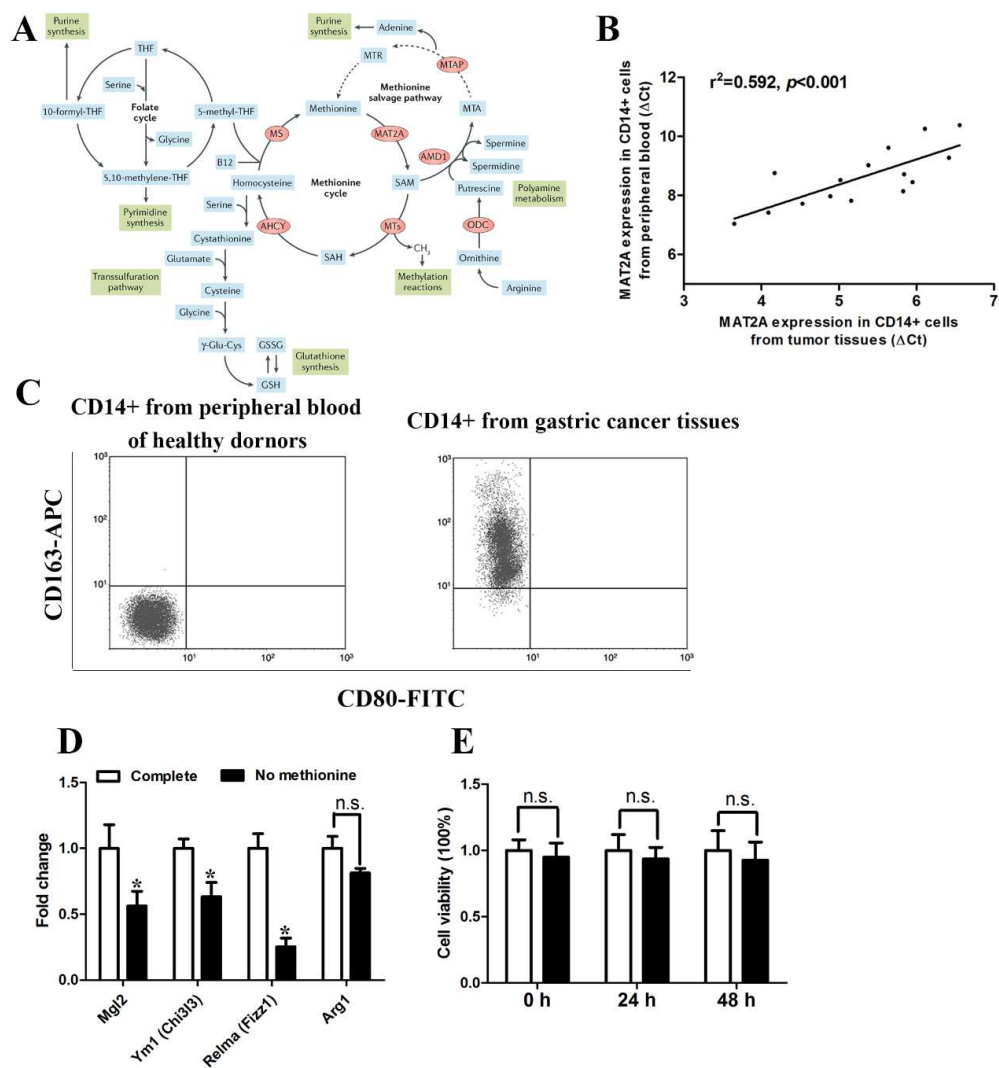

**Supplemental Figure S1.** (A) Methionine is an essential sulfur-containing amino acid

that is catabolized and recycled in a series of metabolic reactions termed the methionine cycle. (B) The correlation between MAT2A mRNA levels was measured in CD14<sup>+</sup> cells isolated from tumor tissues and from paired peripheral blood of 15 GC patients. The  $\Delta C_t$  values (normalized to  $\beta$ -actin) were subjected to Spearman rank-correlation analysis. (C) FACS dot plots depicting CD80 and CD163 expression

in CD14<sup>+</sup> cells purified from peripheral blood of healthy donors or gastric cancer tissues of GC patients.

(D) qPCR analysis of the M2-associated genes *Relma*, *Mgl2* and *Ym1* after 24 h methionine starvation. (E) Cell viability determined with CCK8 assay in the presence or absence of 48-h methionine starvation. Values normalized to that of control.

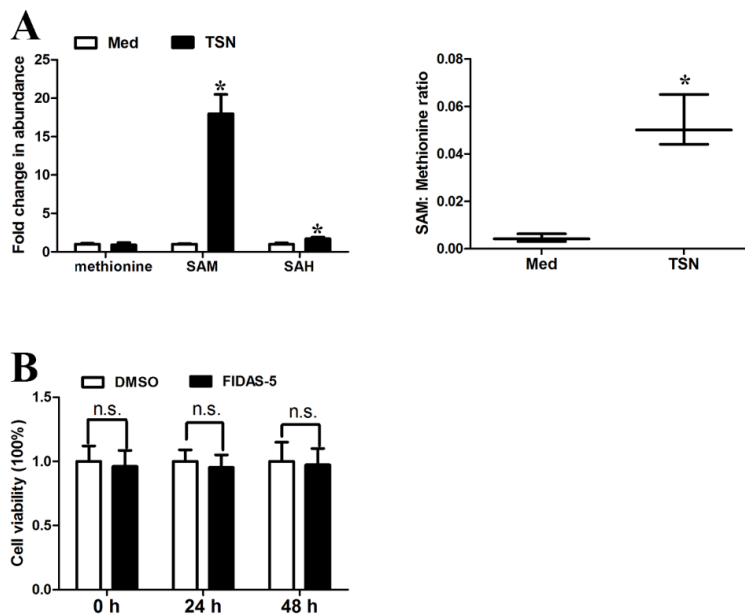

**Supplemental Figure S2.** CD14<sup>+</sup> cells were isolated from peripheral blood of healthy donors. CD14<sup>+</sup> Cells were left untreated or treated with supernatant (TSN) from BGC823 cells for 20 h. (A) (Left) LC-MS was used to determine the abundance of methionine cycle metabolites in CD14<sup>+</sup> cells purified from tumor tissues 48 h after

methionine starvation. Values were normalized to that in the absence of TSN. (Right)  
Ratio of SAM to methionine levels in CD14<sup>+</sup> cells. (B) Cell viability determined with  
CCK8 assay in the presence or absence of FIDAS-5 treatment. Values normalized to  
that of control.

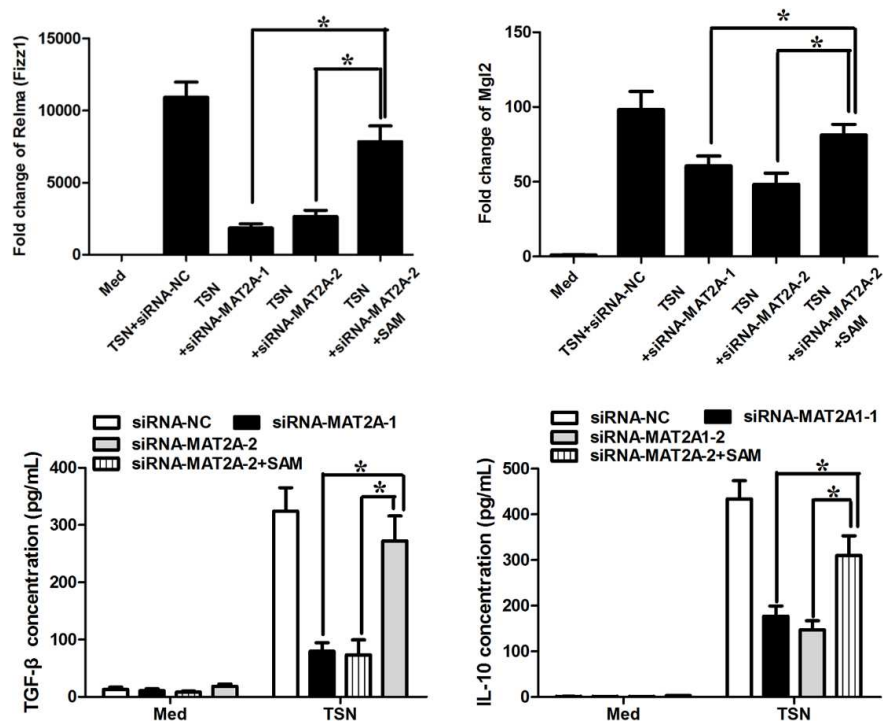

**Supplemental Figure S3.** CD14<sup>+</sup> cells transfected with siRNA-NC or siRNA-MAT2A were left untreated or treated with MGC803 TSN for 28 hours in the presence or absence of SAM supplementation (500  $\mu$ M). qRT-PCR analysis of the M2-associated genes Mgl2 and Relma (Fizz1). ELISA analysis of IL-10 and TGF- $\beta$  production.

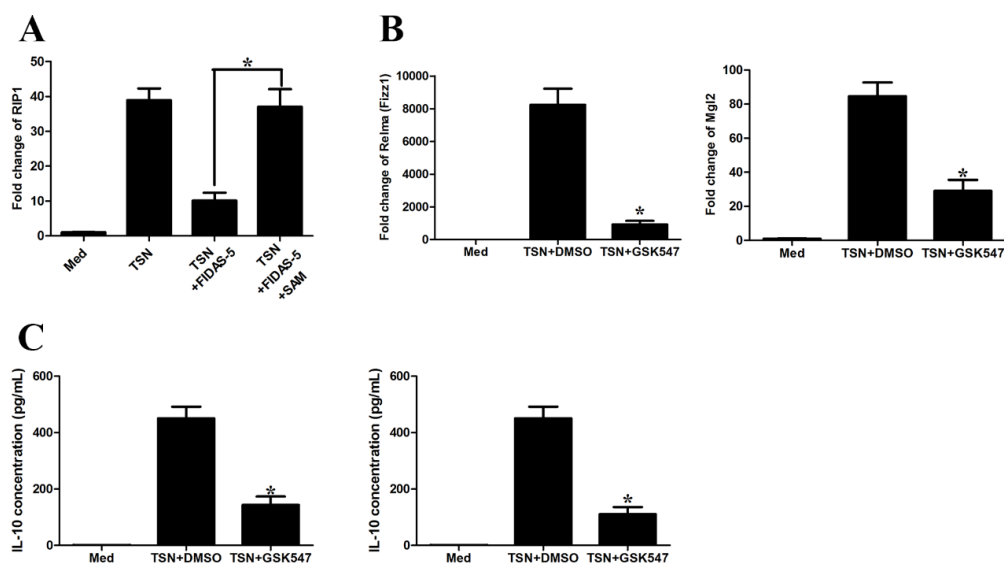

**Supplemental Figure S4.** (A) CD14<sup>+</sup> cells were left untreated or treated with BGC823 TSN for 20 hours in the presence or absence of FIDAS-5 treatment (10  $\mu$ M) or SAM supplementation (500  $\mu$ M). qRT-PCR analysis of RIP1. (B,C) CD14<sup>+</sup> Cells were left untreated or treated with supernatant (TSN) from MGC803 cells for 20 h in the presence or absence of RIP1 inhibitor (GSK547, 50 nM). (B) qRT-PCR analysis

of the M2-associated genes Mgl2 and Relma (Fizz1). (C) ELISA analysis of IL-10 and TGF- $\beta$  production.

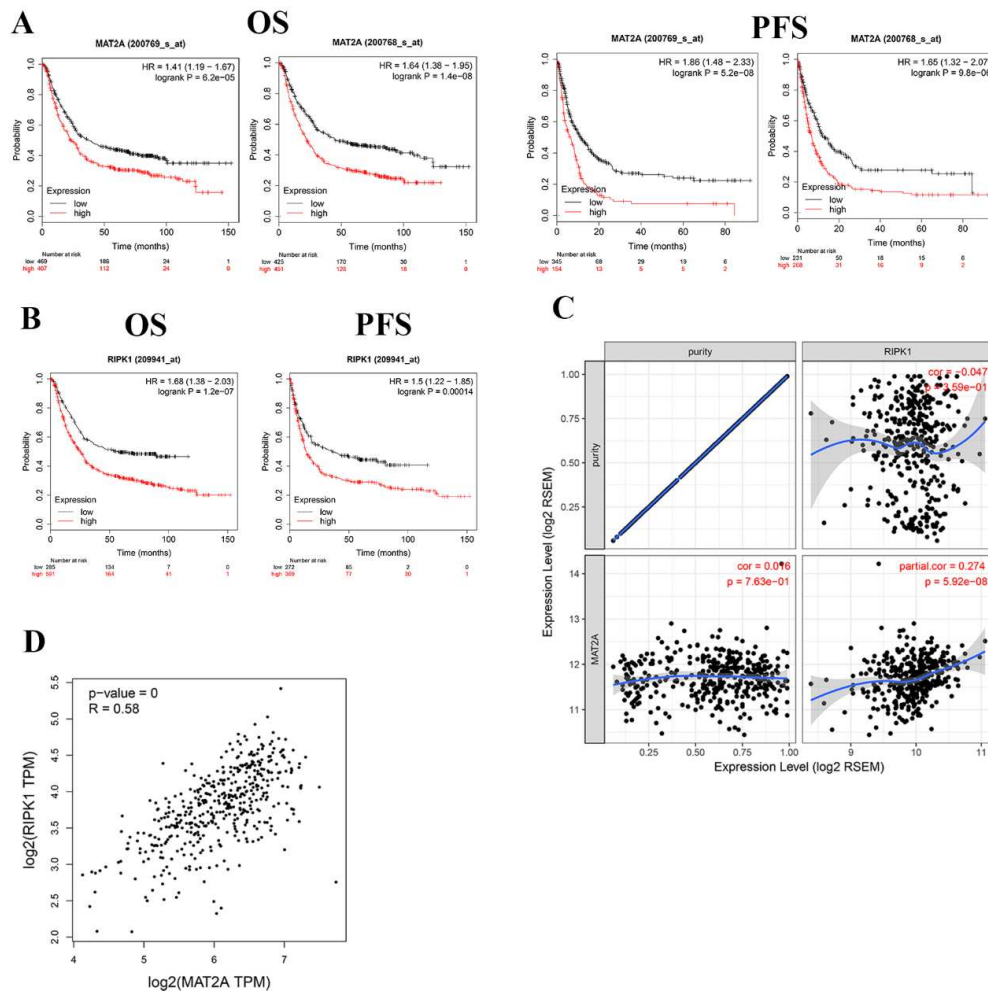

**Supplemental Figure S5.** (A) A higher expression level of MAT2A is correlated with a significantly poorer OS ( $p < 0.05$ ) and PFS ( $p < 0.05$ ) in GC according to data from the KMPlot database. (B) A higher expression level of RIP1 is correlated with a significantly poorer OS ( $p < 0.05$ ) and PFS ( $p < 0.05$ ) according to data from the KMPlot database. The HRs and p values were calculated with log-rank tests. (C) Scatterplots of correlations between MAT2A expression and RIP1 expression adjusted by purity according to TIMER (<http://cistrome.org/TIMER/>) in STAD. (D) Correlation results between MAT2A and RIP1 according to GEPIA (<http://gepia.cancer-pku.cn/>) in STAD.



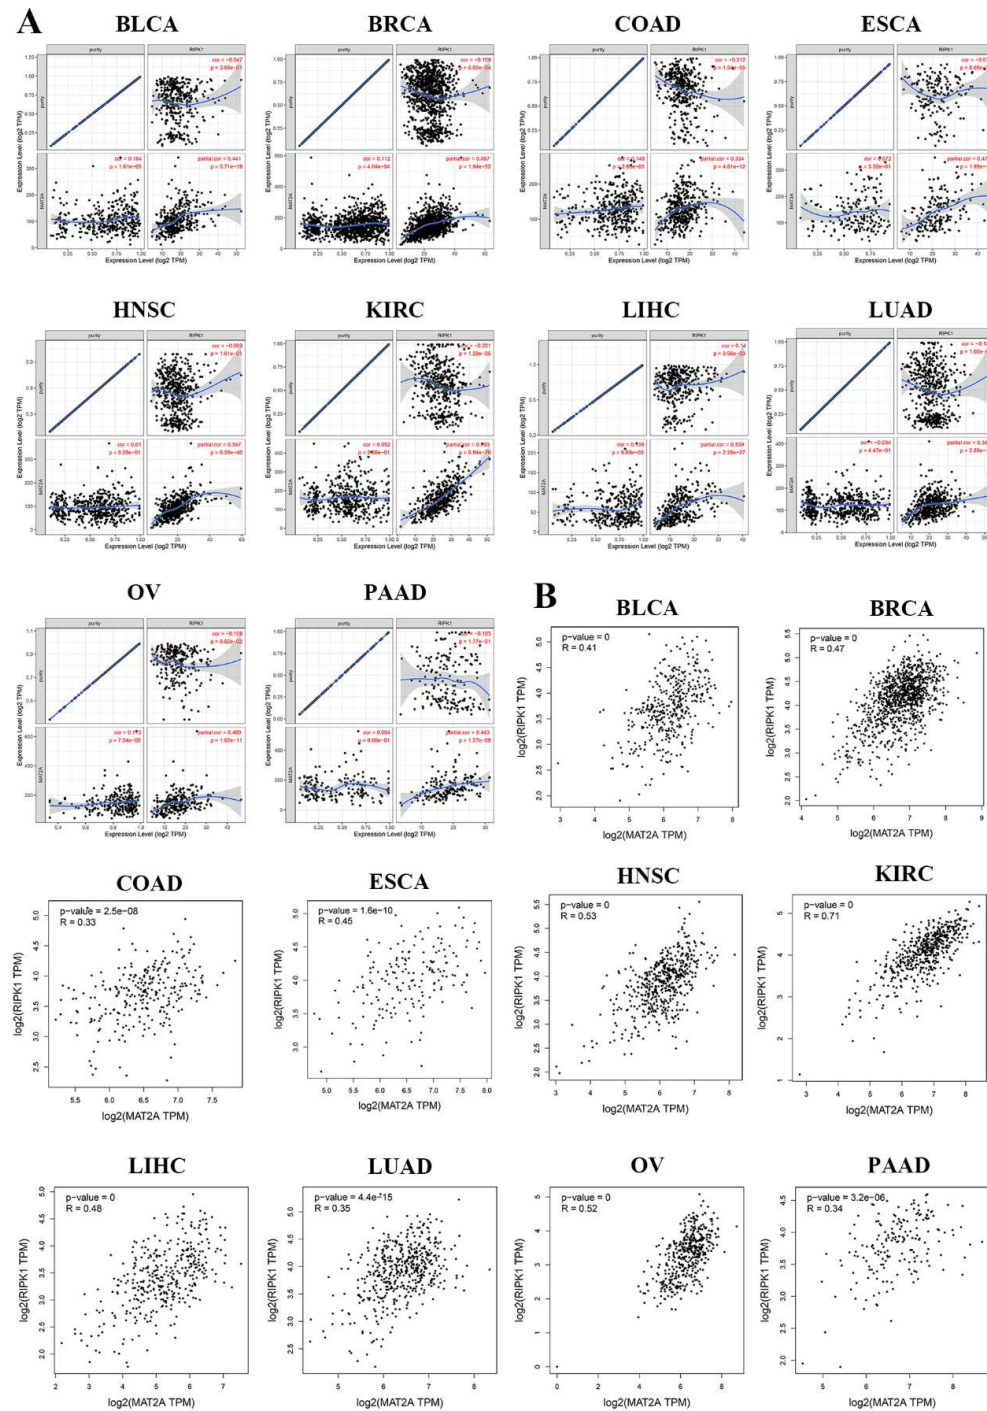

**Supplemental Figure S6.** (A) Scatterplots of correlations between MAT2A expression and RIP1 expression adjusted by purity according to TIMER

(<http://cistrome.org/TIMER/>) in BLCA (bladder urothelial carcinoma), BRCA (breast invasive carcinoma), COAD (colon adenocarcinoma), ESCA (esophageal carcinoma), HNSC (head and neck cancer), KIRC (kidney renal clear cell carcinoma), LIHC (liver hepatocellular carcinoma), LUAD (lung adenocarcinoma), OV (ovarian cystadenocarcinoma), PAAD (pancreatic adenocarcinoma). **(B)** Correlation results between MAT2A and RIP1 according to GEPIA (<http://gepia.cancer-pku.cn/>) in BLCA, BRCA, COAD, ESCA, HNSC, KIRC, LIHC, LUAD, OV, PAAD.

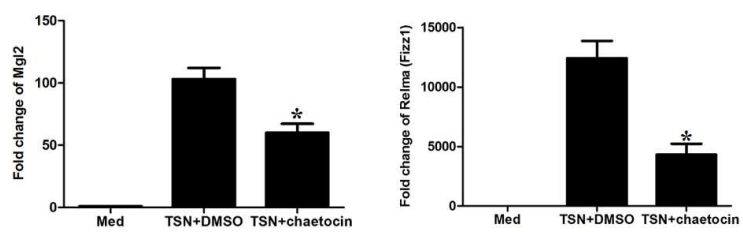

**Supplemental Figure S7.** CD14<sup>+</sup> Cells were pretreated with histone

methyltransferase inhibitor (chaetocin, 0.5  $\mu$ M) for 1h before left untreated or treated with supernatant (TSN) from MGC803 cells for 20 h. qRT-PCR analysis of the M2-associated genes Mgl2 and Relma (Fizz1).

Supplemental Table S1. Clinicopathological characteristics of 32 GC patients

| Characteristics                 | Number of patients (%) |
|---------------------------------|------------------------|
| Patients                        | 32                     |
| Gender                          |                        |
| Male                            | 21 (65.63%)            |
| Female                          | 11 (34.37%)            |
| Age (years)                     | 38 to 69, mean 57.32   |
| Tumor size (cm)                 | 1.32 to 14, mean 3.46  |
| Lymph node metastasis (N stage) |                        |
| N0                              | 9 (28.13%)             |
| N1                              | 6 (18.75%)             |
| N2                              | 10 (32.15%)            |
| N3                              | 7 (21.87%)             |
| Depth of invasion (T stage)     |                        |
| T1                              | 6 (18.75%)             |
| T2                              | 7 (21.88%)             |
| T3                              | 13 (40.63%)            |
| T4                              | 6 (18.75%)             |
| Histology                       |                        |
| well and moderately             | 15 (46.88%)            |
| Poorly and others               | 17 (53.12%)            |
| Perineural Invasion             |                        |

|                         |             |
|-------------------------|-------------|
| Negative                | 20 (62.50%) |
| Positive                | 12 (37.50%) |
| Lymphovascular invasion |             |
| Negative                | 24 (75.00%) |
| Positive                | 8 (25.00%)  |
| Gross type              |             |
| EGC                     | 3 (9.38%)   |
| Borrmann type I         | 2 (6.25%)   |
| Borrmann type II        | 6 (18.75%)  |
| Borrmann type III       | 15 (46.87%) |
| Borrmann type IV        | 6 (18.75%)  |

Abbreviations: EGC, early gastric cancer;TNM, tumor-nodes-metastasis,based on the American Joint Committee On Cancer/International Union Against Cancer Staging Manual(8th editon, 2016).

Supplemental Table S2. Clinical characteristics of 15 GC patients.

| Code | Gender | Age (yr) | TNM stage |
|------|--------|----------|-----------|
| 3    | female | 47       | IIB       |
| 12   | male   | 52       | IIIA      |
| 19   | male   | 44       | IIIB      |
| 25   | female | 65       | IIA       |
| 29   | male   | 60       | IIB       |
| 33   | female | 73       | IIIA      |
| 34   | male   | 53       | IIIB      |
| 35   | male   | 81       | IIIC      |
| 36   | male   | 67       | IIIB      |
| 37   | female | 74       | IIB       |
| 38   | female | 69       | IIIB      |
| 39   | male   | 55       | IIIC      |

---

|    |        |    |      |
|----|--------|----|------|
| 40 | male   | 71 | IIb  |
| 41 | male   | 66 | IIIc |
| 42 | female | 73 | IIb  |

---

**Supplemental Table S3.** Primer sequence used in this study.

| PCR Primers       |                               |
|-------------------|-------------------------------|
| Gene              | sequence                      |
| $\beta$ -Actin-F  | 5'-GGGAAATCGTGCGTGACATTAAG-3' |
| $\beta$ -Actin -R | 5'-TGTGTTGGCGTACAGGTCTTTG-3'  |
| CD11b-F           | 5'-ATCTCTGCTGGCTTTCCAGT-3'    |
| CD11b-R           | 5'-ATGCTGTGCTGTCCTCTCTG-3'    |
| RBPj-F            | 5'-CGGCCTCCACCTAAACGAC-3'     |
| RBPj-R            | 5'-TCCATCCACTGCCATAAGAT-3'    |
| MS4A4A-F          | 5'-CTGGGAAACATGGCTGTCATA-3'   |
| MS4A4A-R          | 5'-CTCATCAGGGCAGTCAGAATC-3'   |
| CD51-F            | 5'-GCTGTCCGAGATTCAATGGT-3'    |
| CD51-R            | 5'-TCTGCTCGCCAGTAAAATTGT-3'   |



|             |                                |
|-------------|--------------------------------|
| CD39-F      | 5'-CCATCCTTGGCTTCTCCTCTAT-3'   |
| CD39-R      | 5'-CCACGCCTGTGTCATTCTCCT-3'    |
| Camkk2-F    | 5'-CATGAATGGACGCTGC-3'         |
| Camkk2-R    | 5'-TGACAACGCCATAGGAGCC-3'      |
| PFKFB3-F    | 5'-CTCGCATCAACAGCTTTGAGG-3'    |
| PFKFB3-R    | 5'-TCAGTGTTCCTGGAGGAGTC-3'     |
| NLRC4-F     | 5'-GCGGAGGTGGGAGATATG-3'       |
| NLRC4-R     | 5'-CGTAGAAGGTTTGAACA-3'        |
| EphB4-F     | 5'-GGATCGCATTACGCCAAAGT-3'     |
| EphB4-R     | 5'-ACTGTCTAAGGCTGTGGCAT-3'     |
| Clever-1-F  | 5'-CTGTGTCCTGGTCCTCTGC-3'      |
| Clever-1-R  | 5'-CGCAACGTTTAGACCGTACC-3'     |
| LAMP2a-F    | 5'-CACCGTCCTTGTGCCCATAGCGGT-3' |
| LAMP2a-R    | 5'-AAACACCGCTATGGGCACAAGGAC-3' |
| ATP6V0d2-F  | 5'-TGCGGCAGGCTCTATCCAGAGG-3'   |
| ATP6V0d2-R  | 5'-CCACTGCCACCGACAGCGTC-3'     |
| RIP1-F      | 5'-CCTGCTGGAGAAGACAGACC-3'     |
| RIP1-R      | 5'-CATCATCTTCCCCTTTC-3'        |
| ICER-F      | 5'-ATGGCTGTAACCTGGAGATGAA-3'   |
| ICER-R      | 5'-GTGGCAAAGCAGTAGTAGGA-3'     |
| NRP2-F      | 5'-GACTCCAAGCCACGGTAGA-3'      |
| NRP2-R      | 5'-TGGTTGTCTCTTCGCTCTTCAC-3'   |
| MGLL-F      | 5'-ACAAGTCAGGTCAGGCTTCA-3'     |
| MGLL-R      | 5'-AAGTGGGGCCTTTCATAGCT-3'     |
| Lgr4 -F     | 5'-GCCTGAATGGGCTAAATCAA-3'     |
| Lgr4 -R     | 5'-CCTTTCCTGTGCCACACT-3'       |
| LILRB2-F    | 5'-ACCCCTGGACATCCTGATCAC-3'    |
| LILRB2-R    | 5'-TGGAGTCTCTGTACCCTCC-3'      |
| ERK5-F      | 5'-GCCTGTGTGTCCAGATGTTG-3'     |
| ERK5-R      | 5'-CAGGCTGCAGAGTCAGATCA-3'     |
| NDRG2-F     | 5'-CCCTGTGTTCCCTTTGGGAT-3'     |
| NDRG2-R     | 5'-GTGAGGCCTGTTAGCTTGTG-3'     |
| FABP4-F     | 5'-TTTCCTCAAACCTGGGCGTG-3'     |
| FABP4-R     | 5'-CATTCCACCACCAGCTTGTG-3'     |
| FoxO1-F     | 5'-AGGATCCGATGTACCATGGCCG-3'   |
| FoxO1-R     | 5'-AAAGGATCCACCATGGCCG-3'      |
| ZEB1-F      | 5'-GATGACCTGCCAACAGACCA-3'     |
| ZEB1-R      | 5'-CTTTCCTGCTCCTCCCTGG-3'      |
| ITGA4-F     | 5'-TTCCAGAGCCAAATCCAAGAGTAA-3' |
| ITGA4-R     | 5'-AAGCCAGCCTTCCACATAACAT-3'   |
| S1PR1-F     | 5'-CAGCAAATCGGACAATTCCT-3'     |
| S1PR1-R     | 5'-GCCAGCGACCAAGTAAAGAG-3'     |
| Siglec-10-F | 5'-GTGACCGTTGTCTGCTTTTCC-3'    |
| Siglec-10-R | 5'-CCAGGCTCTGGAGGAGCAGTT-3'    |

|                     |                                   |
|---------------------|-----------------------------------|
| c-Maf-F             | 5'- CAGCAAGGAGGAGGTGATCC-3'       |
| c-Maf-R             | 5'- GGTTCTTCTCCGACTCCAGG-3'       |
| GCN2-F              | 5'- TCTCCCAGTCCTTTCTACCTG-3'      |
| GCN2-R              | 5'- TGTCACTGAAGGCTCAATCTC-3'      |
| ABHD5-F             | 5'-CCGGCTTCGAGATAAGTCCC-3'        |
| ABHD5-R             | 5'-GCCAACCAGTTAGCCATCCT-3'        |
| LIF-F               | 5'-ACAGAGCCTTTGCGTGA AAC-3'       |
| LIF-R               | 5'-TGGTCCACACCAGCAGATAA-3'        |
| STAT6-F             | 5'-GTGGTTTAGAAGAGGGGAATTT-3'      |
| STAT6-R             | 5'-ATCTCAACCCCTATCTACCC-3'        |
| STAT1-F             | 5'-AGTTTGATGTTTGTTGGGATTAATTAG-3' |
| STAT1-R             | 5'-ATCTCAATACTCACTTTTCTCTACA-3'   |
| SLC7A5-F            | 5'- GCATCG GCTTCACCATCA TC -3'    |
| SLC7A5-R            | 5'- ACCACCTGCATGAGCTTCTGAC -3'    |
| CD36-F              | 5'-GAACCACTGCTTTCAAAA ACTGG-3'    |
| CD36-R              | 5'-GTCTGAGTTATATTTTCTTGG-3'       |
| FABP4-F             | 5'-TTTCTTCAAACCTGGCGTG-3'         |
| FABP4-R             | 5'-CATTCCACCACCAGCTTGTC-3'        |
| Fizz1-F             | 5'-TCGTGGAGAATAAGGTCAAGG-3'       |
| Fizz1-R             | 5'-AGGAGGCCCATCTGTTTATA-3'        |
| Mgl2-F              | 5'-AGGCACCCTAAGAGCCATTT-3'        |
| Mgl2-R              | 5'-CCCTCTTCTCCAGTGTGCTC-3'        |
| Arg-1-F             | 5'- AGACAGCAGAGGAGGTGAAGAG-3'     |
| Arg-1-R             | 5'- CGAAGCAAGCCAAGTTAAAGC-3'      |
| Ym-1-F              | 5'- CATTCAAGTCAGTTATCAGATTCC-3'   |
| Ym-1-R              | 5'- AGTGAGTAGCAGCCTTGG-3'         |
| MAT2A-F             | 5'-GACATTGGTGCTGGAGACCA-3'        |
| MAT2A-R             | 5'-ACTCTGATG GGAAGCACAGC-3'       |
| SHMT2-F             | 5'-CGAGTTGCGATGCTGTACTT-3'        |
| SHMT2-R             | 5'-CTGCGTTGCTGTGCTGAG-3'          |
| MTHFR -F            | 5'-TTTAGGTATGTGAAGTAGGGTAGATGT-3' |
| MTHFR -R            | 5'-CAAAAACTAATAAAAAACCAACAAA-3'   |
| MTR-F               | 5'-GTTCTGTTTCTCCAGGTCC-3'         |
| MTR -R              | 5'-GAAGAATCGCATCGCTGC-3'          |
| GLDC-F              | 5'-GATGCATTCATGAGTATTGCCAAGT-3'   |
| GLDC-R              | 5'-GTGGACCACTCGGATGAGCTC-3'       |
| RIP1-F              | 5'-TTCGGGAAGGTGTCCTTGTG-3'        |
| RIP1-R              | 5'-CATTGTACTCAGCGCGTTG-3'         |
| Vector construction |                                   |
| siRNA-MAT2A-1       | 5'-CACACAAGCUAAAUGCCAA-3'         |
| siRNA- MAT2A-2      | 5'- CAGUUGUGCCUGCGAAAUA -3'       |
| siRNA-NC            | 5'- UUCUCCGAACGUGUCACGUTT -3'     |
| siRNA-WDR5-1        | 5'-GCUGGGAUAUCCGAUGUATT-3'        |
| siRNA-WDR5-2        | 5'-GCUCAGAGGAUAACCUUGUTT-3'       |

---

|                 |                                       |
|-----------------|---------------------------------------|
| RIP1-promoter-F | 5'-GCCGAGCTCGAGGGAGTGGACGCTGGAGCAA-3' |
| RIP1-promoter-R | 5'-GCCGCTAGTCGTCCCGTCACCCTCCTCT-3'    |

---

**Supplemental Table S4.** Information on antibodies.

| Antibody       | WB     | CHIP  | Specificity       | Company (catalog number) |
|----------------|--------|-------|-------------------|--------------------------|
| RIP1           | 1:1000 | /     | Rabbit monoclonal | Abcam (ab106393)         |
| MAT2A          | 1:1000 | /     | Rabbit polyclonal | Abcam (ab154343)         |
| WDR5           | 1:1000 | 1:200 | Rabbit polyclonal | Abcam (ab56916)          |
| $\beta$ -Actin | 1:2000 | /     | Rabbit polyclonal | Abcam (ab8227)           |
| histone H3     | 1:1000 | /     | Rabbit monoclonal | CST (9715S)              |
| H3K4me3        | 1:1000 | 1:200 | Rabbit polyclonal | Abcam (8580)             |
| H3K27me3       | 1:1000 | /     | Rabbit monoclonal | Abcam (ab192985)         |

Supplemental Table S5. Elution conditions for LC/MS analysis.

|                      | Time (min) | Solvent A (%) | Solvent B1 (%) | Solvent B2 (%) | Flow rate (mL/min) |
|----------------------|------------|---------------|----------------|----------------|--------------------|
| Sample analysis      | Initial    | 99.90         | 0.10           |                | 0.40               |
|                      | 0.50       | 99.90         | 0.10           |                |                    |
|                      | 8.50       | 50.00         | 50.00          |                |                    |
|                      | 8.51       | 2.00          | 98.00          |                |                    |
|                      | 11.50      | 2.00          | 98.00          |                |                    |
| Column wash          | 12.50      | 2.00          |                | 98.00          | 0.50               |
|                      | 15.50      | 2.00          |                | 98.00          |                    |
| Column equilibration | 16.50      | 99.90         | 0.10           |                | 0.40               |
|                      | 18.00      | 99.90         | 0.10           |                |                    |

Solvent A: 0.1% formic acid in water, Solvent B1: 0.1% formic acid in methanol and Solvent

Supplemental Table S6. Optimized compound-dependent MS parameters using Xevo TQ-S

mass spectrometer.

| Analyte                | Precursor ion mass (m/z) | Fragment ion mass (m/z) | Dwell time (s) | Cone voltage (V) | Collision Energy (V) | ESI Mode |
|------------------------|--------------------------|-------------------------|----------------|------------------|----------------------|----------|
| Methionine             | 150.00                   | 105.00                  | 0.025          | 40.00            | 15.00                | Pos      |
| S-adenosylmethionine   | 399.00                   | 136.00                  | 0.025          | 62.00            | 42.00                | Pos      |
| S-adenosylhomocysteine | 385.00                   | 134.00                  | 0.025          | 66.00            | 33.00                | Pos      |

Supplemental Table S7. Regulators of antitumor immunity in tumor-associated macrophages

and relative fold-change in response to TSN in presence or absence of FIDAS-5

| Factors                    | Effect     | Ref  | Fold-change |
|----------------------------|------------|------|-------------|
| CD11b(ITGAM)               | antitumor  | [1]  | 2.32        |
| RBPj                       | pro-tumor  | [2]  | 0.98        |
| MS4A4A                     | antitumor  | [3]  | 0.72        |
| CD51 (ITGAV)               | pro-tumor  | [4]  | 0.56        |
| CD39 (ENTPD1)              | pro-tumor  | [5]  | 0.49        |
| CaMKK2                     | pro-tumor  | [6]  | 0.81        |
| PFKFB3                     | pro-tumor  | [7]  | 0.93        |
| NLRC4                      | pro-tumor  | [8]  | 0.45        |
| EphB4                      | pro-tumor  | [9]  | 1.04        |
| Cleaver-1 (STAB1)          | pro-tumor  | [10] | 0.89        |
| LAMP2a (Lamp2)             | pro-tumor  | [11] | 0.51        |
| ATP6V0d2                   | antitumor  | [12] | 0.87        |
| RIP1 (RIPK1)               | pro-tumor  | [13] | 0.16        |
| ICER (CREM)                | pro-tumor  | [14] | 0.81        |
| NRP2 (NRP2)                | pro-tumor  | [15] | 0.94        |
| MGLL                       | antitumor  | [16] | 0.88        |
| LGR4                       | pro-tumor  | [17] | 0.41        |
| LILRB2                     | pro-tumor  | [18] | 0.62        |
| ERK5 (MAPK7)               | pro-tumor  | [19] | 0.96        |
| NDRG2                      | pro-tumor  | [20] | 0.83        |
| FABP4                      | pro-tumor  | [21] | 0.59        |
| FOXO1                      | antitumor  | [22] | 1.21        |
| ZEB1                       | pro-tumor  | [23] | 0.67        |
| integrin $\alpha$ 4(ITGA4) | pro-tumor  | [24] | 0.42        |
| S1PR1                      | pro-tumor  | [25] | 0.71        |
| Siglec-10                  | pro-tumor  | [26] | 0.96        |
| c-Maf (MAF)                | pro-tumor  | [27] | 0.47        |
| GCN2(EIF2AK4)              | pro-tumor  | [28] | 0.49        |
| ABHD5                      | anti-tumor | [29] | 0.44        |
| LIF                        | pro-tumor  | [30] | 0.82        |
| STAT6                      | pro-tumor  | [31] | 0.58        |
| STAT1                      | antitumor  | [32] | 0.52        |

### Reference

1. Panni RZ, Herndon JM, Zuo C, Hegde S, Hogg GD, Knolhoff BL, Breden MA, Li X, Krisnawan VE, Khan SQ, Schwarz JK, Rogers BE, Fields RC, Hawkins WG, Gupta V, DeNardo DG. Agonism of CD11b reprograms innate immunity to sensitize pancreatic cancer to immunotherapies. *Sci Transl Med.* 2019;11(499).
2. Ye YC, Zhao JL, Lu YT, Gao CC, Yang Y, Liang SQ, Lu YY, Wang L, Yue SQ, Dou KF, Qin HY, Han H. Notch signaling via Wnt regulates the proliferation of alternative, CCR2-independent tumor-associated macrophages in hepatocellular carcinoma. *Cancer Res.* 2019 Jul 2. pii:



canres.1691.2018.

3. Mattioli I, Tomay F, De Pizzol M, Silva-Gomes R, Savino B, Gulic T, Doni A, Lonardi S, Astrid Boutet M, Nerviani A, Carriero R, Molgora M, Stravalaci M, Morone D, Shalova IN, Lee Y, Biswas SK, Mantovani G, Sironi M, Pitzalis C, Vermi W, Bottazzi B, Mantovani A, Locati M. The macrophage tetraspan MS4A4A enhances dectin-1-dependent NK cell-mediated resistance to metastasis. *Nat Immunol.* 2019 Jul 1. doi: 10.1038/s41590-019-0417-y. [Epub ahead of print]
4. Zhang B, Ye H, Ren X, Zheng S, Zhou Q, Chen C, Lin Q, Li G, Wei L, Fu Z, Zhang Y, Hu C, Li Z, Chen R. Macrophage-expressed CD51 promotes cancer stem cell properties via the TGF- $\beta$ 1/smad2/3 axis in pancreatic cancer. *Cancer Lett.* 2019;459:204-215.
5. Takenaka MC, Gabriely G, Rothhammer V, Mascanfroni ID, Wheeler MA, Chao CC, Gutiérrez-Vázquez C, Kenison J, Tjon EC, Barroso A, Vandeventer T, de Lima KA, Rothweiler S, Mayo L, Ghannam S, Zandee S, Healy L, Sherr D, Farez MF, Prat A, Antel J, Reardon DA, Zhang H, Robson SC, Getz G, Weiner HL, Quintana FJ. Control of tumor-associated macrophages and T cells in glioblastoma via AHR and CD39. *Nat Neurosci.* 2019;22(5):729-740.
6. Racioppi L, Nelson ER, Huang W, Mukherjee D, Lawrence SA, Lento W, Masci AM, Jiao Y, Park S, York B, Liu Y, Baek AE, Drewry DH, Zuercher WJ, Bertani FR, Businaro L, Geradts J, Hall A, Means AR, Chao N, Chang CY, McDonnell DP. CaMKK2 in myeloid cells is a key regulator of the immune-suppressive microenvironment in breast cancer. *Nat Commun.* 2019;10(1):2450.
7. Chen DP, Ning WR, Jiang ZZ, Peng ZP, Zhu LY, Zhuang SM, Kuang DM, Zheng L, Wu Y. Glycolytic activation of peritumoral monocytes fosters immune privilege via the PFKFB3-PD-L1 axis in human hepatocellular carcinoma. *J Hepatol.* 2019 May 7. pii: S0168-8278(19)30268-5.
8. Ohashi K, Wang Z, Yang YM, Billet S, Tu W, Pimienta M, Cassel SL, Pandol SJ, Lu SC, Sutterwala FS, Bhowmick N, Seki E. NOD-like receptor C4 Inflammasome Regulates the Growth of Colon Cancer Liver Metastasis in NAFLD. *Hepatology.* 2019 May 1. doi: 10.1002/hep.30693. [Epub ahead of print]
9. Bhatia S, Oweida A, Lennon S, Darragh LB, Milner D, Phan AV, Mueller AC, Van Court B, Raben D, Serkova NJ, Wang XJ, Jimeno A, Clambey ET, Pasquale EB, Karam SD. Inhibition of EphB4-Ephrin-B2 Signaling Reprograms the Tumor Immune Microenvironment in Head and Neck Cancers. *Cancer Res.* 2019;79(10):2722-2735.
10. Viitala M, Virtakoivu R, Tadayon S, Rannikko J, Jalkanen S, Hollmén M. Immunotherapeutic Blockade of Macrophage Clever-1 Reactivates the CD8+ T-cell Response against Immunosuppressive Tumors. *Clin Cancer Res.* 2019;25(11):3289-3303.
11. Wang R, Liu Y, Liu L, Chen M, Wang X, Yang J, Gong Y, Ding BS, Wei Y, Wei X. Tumor cells induce LAMP2a expression in tumor-associated macrophage for cancer progression. *EBioMedicine.* 2019;40:118-134.
12. Liu N1, Luo J, Kuang D, Xu S, Duan Y, Xia Y, Wei Z, Xie X, Yin B, Chen F, Luo S, Liu H, Wang J, Jiang K, Gong F, Tang ZH, Cheng X, Li H, Li Z, Laurence A, Wang G, Yang XP. Lactate inhibits ATP6V0d2 expression in tumor-associated macrophages to promote HIF-2 $\alpha$ -mediated tumor progression. *J Clin Invest.* 2019;129(2):631-646.
13. Wang W, Marinis JM, Beal AM, Savadkar S, Wu Y, Khan M, Taunk PS, Wu N, Su W, Wu J, Ahsan A, Kurz E, Chen T, Yaboh I, Li F, Gutierrez J, Diskin B, Hundeyin M, Reilly M, Lich JD, Harris PA, Mahajan MK, Thorpe JH, Nassau P, Mosley JE, Leinwand J, Kochen Rossi JA, Mishra A, Aykut B, Glacken M, Ochi A, Verma N, Kim JI, Vasudevaraja V, Adeegbe D, Almonte C,

- Bagdatlioglu E, Cohen DJ, Wong KK, Bertin J, Miller G. RIP1 Kinase Drives Macrophage-Mediated Adaptive Immune Tolerance in Pancreatic Cancer. *Cancer Cell*. 2018;34(5):757-774.e7
14. Bohn T, Rapp S, Luther N, Klein M, Bruehl TJ, Kojima N, Aranda Lopez P, Hahlbrock J, Muth S, Endo S, Pektor S, Brand A, Renner K, Popp V, Gerlach K, Vogel D, Lueckel C, Arnold-Schild D, Pouyssegur J, Kreutz M, Huber M, Koenig J, Weigmann B, Probst HC, von Stebut E, Becker C, Schild H, Schmitt E, Bopp T. Tumor immunoevasion via acidosis-dependent induction of regulatory tumor-associated macrophages. *Nat Immunol*. 2018;19(12):1319-1329.
15. Roy S, Bag AK, Dutta S, Polavaram NS, Islam R, Schellenburg S, Banwait J, Guda C, Ran S, Hollingsworth MA, Singh RK, Talmadge JE, Muders MH, Batra SK, Datta K. Macrophage-Derived Neuropilin-2 Exhibits Novel Tumor-Promoting Functions. *Cancer Res*. 2018;78(19):5600-5617.
16. Xiang W, Shi R, Kang X, Zhang X, Chen P, Zhang L, Hou A, Wang R, Zhao Y, Zhao K, Liu Y, Ma Y, Luo H, Shang S, Zhang J, He F, Yu S, Gan L, Shi C, Li Y, Yang W, Liang H, Miao H. Monoacylglycerol lipase regulates cannabinoid receptor 2-dependent macrophage activation and cancer progression. *Nat Commun*. 2018;9(1):2574.
17. Tan B, Shi X, Zhang J, Qin J, Zhang N, Ren H, Qian M, Siwko S, Carmon K, Liu Q, Han H, Du B, Liu M. Inhibition of Rspo-Lgr4 Facilitates Checkpoint Blockade Therapy by Switching Macrophage Polarization. *Cancer Res*. 2018;78(17):4929-4942.
18. Chen HM, van der Touw W, Wang YS, Kang K, Mai S, Zhang J, Alsina-Beauchamp D, Duty JA, Mungamuri SK, Zhang B, Moran T, Flavell R, Aaronson S, Hu HM, Arase H, Ramanathan S, Flores R, Pan PY, Chen SH. Blocking immunoinhibitory receptor LILRB2 reprograms tumor-associated myeloid cells and promotes antitumor immunity. *J Clin Invest*. 2018;128(12):5647-5662.
19. Giurisato E, Xu Q, Lonardi S, Telfer B, Russo I, Pearson A, Finegan KG, Wang W, Wang J, Gray NS, Vermi W, Xia Z, Tournier C. Myeloid ERK5 deficiency suppresses tumor growth by blocking protumor macrophage polarization via STAT3 inhibition. *Proc Natl Acad Sci U S A*. 2018;115(12):E2801-E2810.
20. Li M, Lai X, Zhao Y, Zhang Y, Li M, Li D, Kong J, Zhang Y, Jing P, Li H, Qin H, Shen L, Yao L, Li J, Dou K, Zhang J. Loss of NDRG2 in liver microenvironment inhibits cancer liver metastasis by regulating tumor associated macrophages polarization. *Cell Death Dis*. 2018;9(2):248.
21. Hao J, Yan F, Zhang Y, Triplett A, Zhang Y, Schultz DA, Sun Y, Zeng J, Silverstein KAT, Zheng Q, Bernlohr DA, Cleary MP, Egilmez NK, Sauter E, Liu S, Suttles J, Li B. Expression of Adipocyte/Macrophage Fatty Acid-Binding Protein in Tumor-Associated Macrophages Promotes Breast Cancer Progression. *Cancer Res*. 2018;78(9):2343-2355.
22. Yang JB, Zhao ZB, Liu QZ, Hu TD, Long J, Yan K, Lian ZX. FoxO1 is a regulator of MHC-II expression and anti-tumor effect of tumor-associated macrophages. *Oncogene*. 2018;37(9):1192-1204.
23. Cortés M, Sanchez-Moral L, de Barrios O, Fernández-Aceñero MJ, Martínez-Campanario MC, Esteve-Codina A, Darling DS, Györfy B, Lawrence T, Dean DC, Postigo A. Tumor-associated macrophages (TAMs) depend on ZEB1 for their cancer-promoting roles. *EMBO J*. 2017;36(22):3336-3355.
24. Foubert P, Kaneda MM, Varner JA. PI3K $\gamma$  Activates Integrin  $\alpha$ 4 and Promotes Immune

- Suppressive Myeloid Cell Polarization during Tumor Progression. *Cancer Immunol Res.* 2017;5(11):957-968.
25. Weichand B, Popp R, Dziumbila S, Mora J, Strack E, Elwakeel E, Frank AC, Scholich K, Pierre S, Syed SN, Olesch C, Ringleb J, Ören B, Döring C, Savai R, Jung M, von Knethen A, Levkau B, Fleming I, Weigert A, Brüne B. S1PR1 on tumor-associated macrophages promotes lymphangiogenesis and metastasis via NLRP3/IL-1 $\beta$ . *J Exp Med.* 2017;214(9):2695-2713.
26. Barkal AA, Brewer RE, Markovic M, Kowarsky M, Barkal SA, Zaro BW, Krishnan V, Hatakeyama J, Dorigo O, Barkal LJ, Weissman IL. CD24 signalling through macrophage Siglec-10 is a target for cancer immunotherapy. *Nature.* 2019 Jul 31. doi: 10.1038/s41586-019-1456-0. [Epub ahead of print]
27. Liu M, Tong Z, Ding C, Luo F, Wu S, Wu C, Albeituni S, He L, Hu X, Tieri D, Rouchka EC, Hamada M, Takahashi S, Gibb AA, Kloecker G, Zhang HG, Bousamra M, Hill BG, Zhang X, Yan J. *J Clin Invest.* 2020 Jan 16. pii: 131335. doi: 10.1172/JCI131335. [Epub ahead of print]
28. Halaby MJ, Hezaveh K, Lamorte S, Ciudad MT, Kloetgen A, MacLeod BL, Guo M, Chakravarthy A, Medina TDS, Ugel S, Tsirigos A, Bronte V, Munn DH, Pugh TJ, De Carvalho DD, Butler MO, Ohashi PS, Brooks DG, McGaha TL. GCN2 drives macrophage and MDSC function and immunosuppression in the tumor microenvironment. *Sci Immunol.* 2019;4(42).
29. Miao H, Ou J, Peng Y, Zhang X, Chen Y, Hao L, Xie G, Wang Z, Pang X, Ruan Z, Li J, Yu L, Xue B, Shi H, Shi C, Liang H. Macrophage ABHD5 promotes colorectal cancer growth by suppressing spermidine production by SRM. *Nat Commun.* 2016;7:11716.
30. Pascual-García M, Bonfill-Teixidor E, Planas-Rigol E, Rubio-Perez C, Iurlaro R, Arias A, Cuartas I, Sala-Hojman A, Escudero L, Martínez-Ricarte F, Huber-Ruano I, Nuciforo P, Pedrosa L, Marques C, Braña I, Garralda E, Vieito M, Squatrito M, Pineda E, Graus F, Espejo C, Sahuquillo J, Tabernero J, Seoane J. LIF regulates CXCL9 in tumor-associated macrophages and prevents CD8+ T cell tumor-infiltration impairing anti-PD1 therapy. *Nat Commun.* 2019;10(1):2416.
31. Cao J, Dong R, Jiang L, Gong Y, Yuan M, You J, Meng W, Chen Z, Zhang N, Weng Q, Zhu H, He Q, Ying M, Yang B. LncRNA-MM2P Identified as a Modulator of Macrophage M2 Polarization. *Cancer Immunol Res.* 2019;7(2):292-305.
32. Xi J, Huang Q, Wang L, Ma X, Deng Q, Kumar M, Zhou Z, Li L, Zeng Z, Young KH, Zhang M, Li Y. miR-21 depletion in macrophages promotes tumoricidal polarization and enhances PD-1 immunotherapy. *Oncogene.* 2018;37(23):3151-3165.
